# Supplementary material for: Investigation of the relationships between peri-implant diseases, periodontal diseases, and conditions: a cross-sectional study
Source: PeerJ. 2024 Dec 3;12:e18663. doi: 10.7717/peerj.18663 (PMC11622867; doi:10.7717/peerj.18663)
Supplement: Supplemental Information 2 [file peerj-12-18663-s002.xlsx]

## Sheet: Sayfa1
	Implant Number	Age	Sex	Education status	Working status	Weight	Height	Implant plaque indices	Implant gingival indices	Implant Probing Depth	Implant Bleeding on Probing	Implant Gingival Recession	Implant Clinical Attachment Level	Periimplant Health-Disease	Periodontal plaque indices	Periodontal gingival indices	Periodontal probing depth	Periodontal bleeding on probing	Periodontal gingival recession	Periodontal attachment level	Periodontal Health-Disease	Dental Implant Health Scale
1	16	54	M	SECONDARY SCHOOL	WORKİNG	120	160	0	0	3.5	0.5	0	3.5	periimplantitis	1.7	0	2.2	0.28	0.26	2.4	gingivitis	2
2	14	66	M	ELEMENTARY SCHOOL	WORKİNG	70	177	0	0	3.2	0.2	2	4	periimplantitis	0	0.1	2	0.01	0	2	periodontal health	1
	24	66	M	ELEMENTARY SCHOOL	WORKİNG	70	177	0	0	3	0.2	2	5	periimplantitis	0	0.1	2	0.01	0	2	periodontal health	1
	36	66	M	ELEMENTARY SCHOOL	WORKİNG	70	177	0	0	2.3	0.33	1	3	periimplantitis	0	0.1	2	0.01	0	2	periodontal health	1
	46	66	M	ELEMENTARY SCHOOL	WORKİNG	70	177	0	0	3	0.66	1	0	periimplantitis	0	0.1	2	0.01	0	2	periodontal health	1
3	15	48	F	UNIVERSITY	NON-WORKING	65	168	0	0	3.5	1	0.3	3.8	periimplantitis	1.5	0.1	2	0.1	0.15	2.2	periodontitis	3
	16	48	F	UNIVERSITY	NON-WORKING	65	168	0	0	7.1	1	0	7.1	periimplantitis	1.5	0.1	2	0.1	0.15	2.2	periodontitis	3
	25	48	F	UNIVERSITY	NON-WORKING	65	168	0	0	7.5	1	0	7.5	periimplantitis	1.5	0.1	2	0.1	0.15	2.2	periodontitis	2
	36	48	F	UNIVERSITY	NON-WORKING	65	168	0	0.2	2.8	1	0	2.8	periimplantitis	1.5	0.1	2	0.1	0.15	2.2	periodontitis	2
4	36	53	M	ELEMENTARY SCHOOL	RETİRED	75	170	1	0	3.5	1	0	3.5	periimplantitis	0.06	0	2.1	0.17	0.05	2.2	gingivitis	1
5	16	61	F	HIGH SCHOOL	WORKİNG	63	1.73	0	0	2.5	0.16	0	2.5	periimplantitis	0	0.1	2	0.08	0	2	periodontal health	1
6	17	53	F	ELEMENTARY SCHOOL	NON-WORKING	64	1.63	0	0	3	1	0	3	periimplantitis	0.03	0.2	2.1	0.13	0.1	2.2	periodontitis	1
	25	53	F	ELEMENTARY SCHOOL	NON-WORKING	64	1.63	0	0	2.5	0	0	2.5	periimplantitis	0.03	0.2	2.1	0.13	0.1	2.2	periodontitis	1
	26	53	F	ELEMENTARY SCHOOL	NON-WORKING	64	1.63	0	0	3.5	0	0	3.5	periimplantitis	0.03	0.2	2.1	0.13	0.1	2.2	periodontitis	1
	45	53	F	ELEMENTARY SCHOOL	NON-WORKING	64	1.63	0	0	3	0.16	0	3	periimplantitis	0.03	0.2	2.1	0.13	0.1	2.2	periodontitis	1
7	24	42	M	HIGH SCHOOL	WORKİNG	82	1.68	0	1	3.2	1	0	3.2	periimplantitis	0.3	0.35	2.13	0.13	0.03	2.2	gingivitis	1
8	15	48	M	UNIVERSITY	WORKİNG	82	1.69	0	0	2.6	1	0	2.6	periimplantitis	0.05	0	2	1	0	2	gingivitis	1
	16	48	M	UNIVERSITY	WORKİNG	82	1.69	0	0	2.8	1	0	2.8	periimplantitis	0.5	0	2	1	0	2	gingivitis	1
9	47	63	F	UNIVERSITY	WORKİNG	79	163	0	1	3	1	0	3	periimplantitis	0.4	0	2.1	0.48	0.1	2.2	gingivitis	1
10	16	60	M	ELEMENTARY SCHOOL	RETİRED	85	175	0	0	3	1	5	5	periimplantitis	0.43	0.3	2.4	0.62	1.3	2.5	periodontitis	1
	27	60	M	ELEMENTARY SCHOOL	RETİRED	85	175	1	0	4	1	5	3	periodontitis	0.43	0.3	2.4	0.62	1.3	2.5	periodontitis	2
11	37	61	F	HIGH SCHOOL	WORKİNG	85	168	0	0	3	0.2	0	3	periimplantitis	0.4	0.1	2	0.2	0	2	gingivitis	1
12	35	66	M	UNIVERSITY	RETİRED	68	172	0.5	0	5.3	1	3.7	5.3	periimplantitis	0.5	0	2.04	0.24	0.2	2.2	gingivitis	2
13	44	57	M	UNIVERSITY	RETİRED	75	170	1	0.3	5.5	1	0	5.5	periimplantitis	0	0	2.1	0.33	0.03	2.1	gingivitis	2
	46	57	M	UNIVERSITY	RETİRED	75	170	0	0	5.7	0.67	0	5.7	periimplantitis	0	0	2.1	0.33	0.03	2.1	gingivitis	2
	47	57	M	UNIVERSITY	RETİRED	75	170	0	0	4	0.5	0	4	periimplantitis	0	0	2.1	0.33	0.03	2.1	gingivitis	1
14	16	38	F	UNIVERSITY	WORKİNG	62	159	0	3.3	2.7	0.2	0	2.7	periimplantitis	0.15	0.1	2.02	0.19	0	2.02	gingivitis	1
15	34	29	M	SECONDARY SCHOOL	WORKİNG	71	168	0	0	3.3	0.5	0	3.3	periimplantitis	0.5	0.2	2	0.2	0	2	gingivitis	1
	44	29	M	SECONDARY SCHOOL	WORKİNG	71	168	0	0	3.2	0.33	0	3.2	periimplantitis	0.5	0.2	2	0.2	0	2	gingivitis	1
16	17	64	M	HIGH SCHOOL	RETİRED	78	170	0	0	2.3	0.2	0	2.3	periimplantitis	0.1	0	2.03	0.03	0.1	2.2	periodontal health	1
17	26	55	M	UNIVERSITY	WORKİNG	83	166	0	0	2.8	0.7	0	2.8	periimplantitis	0.4	0	2.5	0.16	0.1	2.6	periodontal health	1
	46	55	M	UNIVERSITY	WORKİNG	83	166	0.2	0	3	0.5	4	3.7	periimplantitis	0.4	0	2.5	0.16	0.1	2.6	periodontal health	2
18	45	57	M	SECONDARY SCHOOL	WORKİNG	81	169	0	1	12.3	1	1	12.3	periimplantitis	0.1	0.08	2.1	0.21	0.24	2.4	gingivitis	4
	46	57	M	SECONDARY SCHOOL	WORKİNG	81	169	0	1	11	1	1	11	periimplantitis	0.1	0.08	2.1	0.21	0.24	2.4	gingivitis	3
19	22	44	M	UNIVERSITY	WORKİNG	66	170	0	0.5	3.2	0.33	0	3.2	periimplantitis	0.5	0.3	2.8	0.18	0.08	2.3	gingivitis	2
20	46	54	M	ELEMENTARY SCHOOL	WORKİNG	93	172	0.5	0	3.5	1	0	3.5	periimplantitis	0.3	0	2	0.05	0	2	periodontal health	1
21	22	60	F	SECONDARY SCHOOL	NON-WORKING	49	157	0	0	3.2	0.5	0	3.2	periimplantitis	0.3	0.1	3.16	0.81	0.4	3.16	periodontitis	1
22	36	60	M	HIGH SCHOOL	WORKİNG	80	163	0	0	3	0.2	0	3	periimplantitis	0	0	2.1	0	1.8	3.9	periodontal health	1
23	42	72	F	SECONDARY SCHOOL	WORKİNG	75	153	0	0	2	1	0.5	2	periimplantitis	0.02	0.4	2.3	0	0	2.3	periodontal health	1
24	24	42	M	HIGH SCHOOL	WORKİNG	70	170	1	4.2	4.2	1	3	4.2	periimplantitis	0.35	0.1	2.6	0.1	0.1	2.7	periodontitis	3
	26	42	M	HIGH SCHOOL	WORKİNG	70	170	0	4.7	4.7	1	0	4.7	periimplantitis	0.35	0.1	2.6	0.1	0.1	2.7	periodontitis	4
25	16	63	M	HIGH SCHOOL	WORKİNG	83	180	0.5	2.5	1.5	0.33	0.2	1.7	periimplant mukozitis	0.7	0.2	1.5	0.29	0.6	2.1	gingivitis	5
	36							0	0.5	2.5	0.2	0.7	2.7	periimplant mukozitis								3
	37							0.16	0	2.2	0.8	0	2.2	periimplant mukozitis								0
26	45	42	F	ELEMENTARY SCHOOL	WORKİNG	75	175	0	0	2	0.66	2.16	2	periimplant mukozitis	0.1	0.03	2	0.0002	0	2	periodontal health	1
	47							0	0	2.8	0.33	0	2.8	periimplant mukozitis								1
27	31	36	F	SECONDARY SCHOOL	WORKİNG	65	150	0	0.3	2.2	0.8	0	2.2	periimplant mukozitis	0.1	0.03	0.08	0.004	0	0.8	periodontal health	1
	32							0	0.2	2.8	0.8	0	2.8	periimplant mukozitis								1
28	36	45	M	UNIVERSITY	WORKİNG	72	178	0	0.5	2	0.2	0.2	0	periimplant mukozitis	0.125	0.05	2.03	0.02	0.07	2.1	periodontal health	1
	46							0	0	2.2	1	0	2.2	periimplant mukozitis								1
	47							0	0	2	0.5	0	2	periimplant mukozitis								1
29	34	44	F	UNIVERSITY	WORKİNG	85	178	1	0	2	0.5	0	2	periimplant mukozitis	0.6	0.02	2.7	0.25	0.19	2.9	periodontitis	1
	36							0.16	1.4	3	1	0	3	periimplant mukozitis								2
30	15	60	M	HIGH SCHOOL	RETİRED	82	171	0	0.8	2	0.3	0	2	periimplant mukozitis	0.13	0.08	4.3	0.15	0.1	4.3	gingivitis	1
	16							0	0.2	1.3	0.33	0	1.3	periimplant mukozitis								1
31	24	44	F	ELEMENTARY SCHOOL	WORKİNG	66	160	0	0.2	2.5	0.5	0	2.5	periimplant mukozitis	0.3	0.5	2	0.4	0	2	gingivitis	1
	26							0	1	2	0.33	0	2	periimplant mukozitis								1
	34							0	0.3	2.2	0.33	0	2.2	periimplant mukozitis								1
	36							0	0	1.8	0.2	2	1.8	periimplant mukozitis								1
	44							0	0	2.2	0.5	0.5	2.2	periimplant mukozitis								1
	45							1	0	2.2	0.5	0.5	2.2	periimplant mukozitis								1
32	36	38	M	HIGH SCHOOL	WORKİNG	65	173	0	0.3	2.5	0.2	0	2.5	periimplant mukozitis	0	0.01	0.23	0.03	0.07	0.3	periodontal health	1
	44							0	0.2	2.5	0.5	0	2.5	periimplant mukozitis								1
	45							0	0.2	2.7	0.8	0	2.7	periimplant mukozitis								1
33	16	58	F	ELEMENTARY SCHOOL	NON-WORKING	78	160	0	0	2.3	0.5	0	2.3	periimplant mukozitis	0.14	0	2.2	0.52	0	2.2	gingivitis	1
34	22	35	F	UNIVERSITY	WORKİNG	73	170	0	0.5	2.5	1	0	2.5	periimplant mukozitis	0.07	0.07	2.04	0.41	0	2.04	gingivitis	1
35	28	37	M	UNIVERSITY	WORKİNG	86	179	0	0	2.5	0.5	1	2.5	periimplant mukozitis	0.01	0.01	2	0.29	0	2	periodontal health	1
36	13	56	M	SECONDARY SCHOOL	WORKİNG	80	183	0	0	2	1	3	2	periimplant mukozitis	0	0	2.7	0.13	0.48	3.18	gingivitis	1
	14							0	0	2.5	1	0	2	periimplant mukozitis								1
	46							0	0	2	1	0	2	periimplant mukozitis								1
	47							0	0	2	1	0	2	periimplant mukozitis								1
37	11	35	M	HIGH SCHOOL	WORKİNG	62	165	0.2	1.3	2	1	0	2	periimplant mukozitis	0.5	0.05	2.07	0.0003	0.06	2.1	periodontal health	1
38	24	48	M	UNIVERSITY	WORKİNG	81	165	0	0	2.5	1	0	2.5	periimplant mukozitis	0.08	0.04	2.2	0.15	0	2.2	gingivitis	1
	26							0	0	2.5	1	0	2.5	periimplant mukozitis								1
39	15	52	F	UNIVERSITY	WORKİNG	67	162	0	0	1	1	0	1	periimplant mukozitis	0.02	0.07	2	0.06	0	0	periodontal health	1
	46							0	0	1.2	0.5	0	1.2	periimplant mukozitis								1
	47							0.5	0	1.2	0.61	0	1.2	periimplant mukozitis								1
40	16	38	F	HIGH SCHOOL	WORKİNG	70	164	0	0.16	2.1	1	0	2.1	periimplant mukozitis	0.3	0.2	2.03	0.01	0	2.03	periodontal health	1
	17							0	0.16	2.1	0.5	0	2.1	periimplant mukozitis								1
	23							0	0	2	0.5	0	2	periimplant mukozitis								1
41	36	34	M	HIGH SCHOOL	WORKİNG	65	170	0	0	2.2	0.5	0	2.2	periimplant mukozitis	0.4	0.22	2	0.31	0.01	2	gingivitis	1
	46							0	0	2	0.33	0	2	periimplant mukozitis								1
42	13	42	F	ELEMENTARY SCHOOL	WORKİNG	68	160	0	0	2	0	2	0	periimplant health	0	0.6	2.4	1	0.07	2.5	periodontitis	1
43	14	62	M	HIGH SCHOOL	RETİRED	76	178	0	0.2	2	0	0	2	periimplant health	0.18	0.1	2.1	0.14	0.6	2.7	gingivitis	1
44	15	62	M	HIGH SCHOOL	WORKİNG	88	179	0	0	2.3	0	0	2.3	periimplant health	0.01	0.02	2.1	0.08	0.1	2.1	periodontal health	1
45	44	56	F	ELEMENTARY SCHOOL	WORKİNG	80	156	0.16	0	2	0	0	2	periimplant health	0.2	0.3	2.1	0.42	0	2.1	gingivitis	1
46	46	53	F	SECONDARY SCHOOL	RETİRED	98	160	0	0	3.3	0	0	2.3	periimplant health	0.4	0	2.2	0.02	0	2.2	periodontal health	1
47	25	56	F	HIGH SCHOOL	NON-WORKING	72	170	0.2	0	2	0	0	2	periimplant health	0.1	0.1	2	0	0.1	2.1	periodontal health	1
48	12	56	M	UNIVERSITY	WORKİNG	73	170	0	0	2.3	0	0	2.3	periimplant health	0.03	0	2.1	0.05	0.1	2.2	periodontal health	1
49	36	38	M	UNIVERSITY	WORKİNG	73	170	0	0.16	2.3	0	1	0	periimplant health	0.19	0.7	2.2	0.19	0	2.2	gingivitis	1
50	16	40	M	ELEMENTARY SCHOOL	WORKİNG	85	175	0.5	0.5	2	0	0	2	periimplant health	0.5	0.01	2.01	0.37	0.16	2.2	gingivitis	1
51	25	35	M	UNIVERSITY	WORKİNG	95	170	0	0	2	0	0	2	periimplant health	0.04	0	2.01	0.02	0	2	periodontal health	1
52	24	34	F	UNIVERSITY	WORKİNG	58	165	0	0	2	0.16	0	2	periimplant health	0	0	2	0.11	0	2	gingivitis	1
53	24	54	M	ELEMENTARY SCHOOL	RETİRED	88	174	0	0.3	1.8	0	0	1.8	periimplant health	0.06	0	2	0	0.13	2.1	periodontal health	1
54	36	51	M	HIGH SCHOOL	WORKİNG	90	180	0	0	2.2	0	0	2.2	periimplant health	0.04	0.1	2	0.35	0.1	2.1	periodontitis	1
55	35	26	F	UNIVERSITY	WORKİNG	65	158	0	0	2	0	0	2	periimplant health	0.1	0.04	2	0.13	0	2	gingivitis	1
								0	0	2	0	0.2	2.2	periimplant health								1
56	23	62	M	HIGH SCHOOL	RETİRED	66	170	0	0	2	0	0	2	periimplant health	0.06	0	2.1	0.02	0.1	2.2	periodontal health	1
	24							0	0	2	0	0	2	periimplant health
57	25	50	F	UNIVERSITY	WORKİNG	77	168	0	0.7	2.2	0.002	0	2.2	periimplant health	0.6	0.2	2.07	0.001	0.26	2.3	periodontal health	1
	27							0	0	2.5	0.002	0	2.5	periimplant health								1
58	45	52	F	ELEMENTARY SCHOOL	WORKİNG	80	170	0	0	2	0	0	2	periimplant health	0.2	0	2.1	0.11	0.8	3	periodontitis	1
59	36	58	M	UNIVERSITY	WORKİNG	85	172	0	0.3	2	0	0	2	periimplant health	0.1	0.04	2.1	0.23	0	2.1	gingivitis	1
	37							0	0	2	0	0	2	periimplant health								1
60	14	58	F	UNIVERSITY	RETİRED	65	160	0	0	2	0	0	2	periimplant health	0.04	0	2	0.02	2.05	2.05	periodontal health	1
	47							0.5	0	2	0	0	2	periimplant health								1
61	16	43	F	HIGH SCHOOL	WORKİNG	67	165	0.5	0.2	1.4	0.002	0.2	1.3	periimplant health	0.04	0.02	1.3	0.14	0.05	1.3	gingivitis	1
	46							0	0.3	1	0	0	1	periimplant health								1
	47							0	0.2	1	0	0	1	periimplant health								1
62	25	67	F	HIGH SCHOOL	RETİRED	83	153	0	0	2	0	0	2	periimplant health	0.5	0	2	0.09	0.12	2.1	periodontal health	1
63	15	34	F	UNIVERSITY	WORKİNG	60	160	0	0	2	0	0	2	periimplant health	0.06	0	2	0	0.01	2.3	periodontal health	1
64	14	62	F	UNIVERSITY	RETİRED	57	153	0.2	0	2	0.002	0	2	periimplant health	0.02	0.01	2.02	0.04	0	2.02	periodontal health	1
	16							0	0.5	2.2	0.003	0	2.2	periimplant health								1
	36							0.2	0	2.2	0	0	2.2	periimplant health								1
65	14	68	M	UNIVERSITY	RETİRED	79	170	0	0	2.2	0	0	2.2	periimplant health	0	0.1	2.4	0.01	0	2.4	periodontal health	1
	16							0	0	1.7	0	0	1.7	periimplant health								1
66	12	45	F	UNIVERSITY	NON-WORKING	65	160	0	0	2	0	1	3	periimplant health	0.2	0	2.3	0.1	0.8	3	periodontal health	1
	22							0	0	2	0	1	3	periimplant health								1
67	16	52	M	ELEMENTARY SCHOOL	RETİRED	70	167	0	2.5	0	0	0	2.5	periimplant health	0.6	0.4	2.3	0.42	0	0	gingivitis	1
	42							0	0	2	0	1	3	periimplant health								1
68	44	59	F	UNIVERSITY	WORKİNG	98	177	0	0.5	2	0.008	0	2	periimplant health	0.13	0.14	2.1	0.125	0.28	2.4	gingivitis	1
	47							0.2	0	1.7	0	0	1.7	periimplant health								1
69	23	65	F	ELEMENTARY SCHOOL	RETİRED	67	155	0	0	2.5	0	0	2.5	periimplant health	0.02	0	2.4	0.13	0	0	gingivitis	1
	24							0	0	2.5	0	0	2.5	periimplant health								1
